# Supplementary material
Source: PubMed Central journal article supplement (PMC9827560)
Supplement: EMBR-24-e54689-s003.pdf [file EMBR-24-e54689-s003.pdf]

## Expanded View Figures

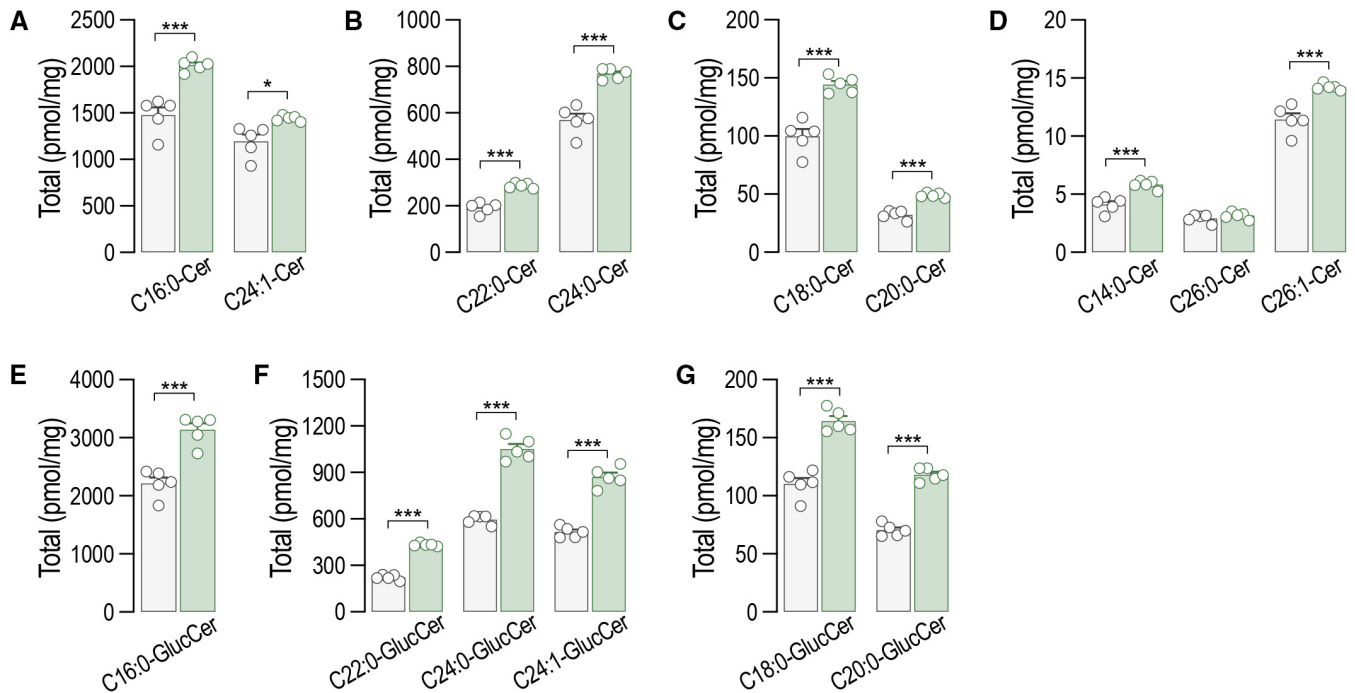

**Figure EV1. Ceramide and glucosylceramide levels are increased in *S1pr1<sup>ECKO</sup>* mEC compared to *S1pr1<sup>fl/fl</sup>*.**

A–G LC–MS/MS quantification of total and specific (A–D) ceramides and (E–G) glucosylceramides in *S1pr1<sup>fl/fl</sup>* and *S1pr1<sup>ECKO</sup>* mEC after 4-OHT (1  $\mu$ M, 72 h) treatment ( $n = 5$ /group from two independent EC isolations/group; four mice/EC isolation).

Data information: Data are expressed as mean  $\pm$  SEM. \*\*\* $P \leq 0.001$ . Statistical significance was determined by unpaired  $t$ -test.

Source data are available online for this figure.

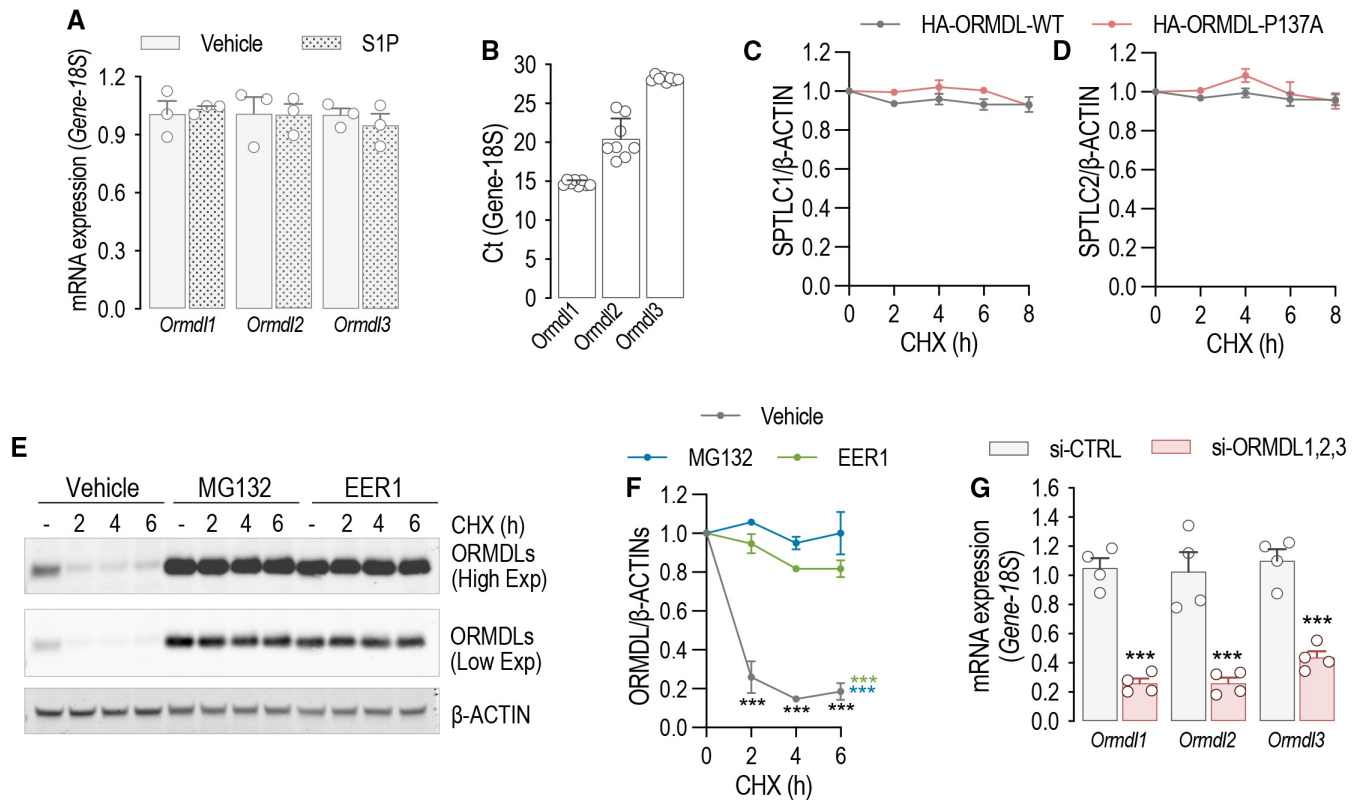

**Figure EV2. S1P inhibits SPT activity via ORM DLs stabilization.**

- A RT-PCR for *Ormdl1*, *Ormdl2*, and *Ormdl3* in the presence or absence of S1P (300 nM, 30') ( $n = 3$  biological replicates).  
 B *Ormdl* isoforms mRNA abundance determined subtracting the Ct of housekeeping 18S from the Ct of *Ormdls* ( $n = 8$  biological replicates).  
 C, D Quantification of © SPTLC1 and (D) SPTLC2 levels from Fig 1C.  
 E, F (E) Western blot analysis for ORM DLs in HUVEC lysates treated with CHX (10  $\mu$ M) for the indicated period of time, in the presence or absence of MG132 (10  $\mu$ M) or EER1 (10  $\mu$ M) and (F) relative quantification.  
 G RT-PCR for *Ormdl1*, *Ormdl2*, and *Ormdl3* before and after independent silencing with the corresponding siRNA (40 nM, 72 h) ( $n = 4$  biological replicates).

Data information: Western blot and RT-PCR are representative of three or more independent biological replicates.  $\beta$ -ACTIN, loading control. Data are expressed as mean  $\pm$  SEM. \*\*\* $P \leq 0.001$ . Statistical significance was determined by two-way ANOVA with Tukey's post-test (C, D, F) and unpaired t-test (A, G). Source data are available online for this figure.

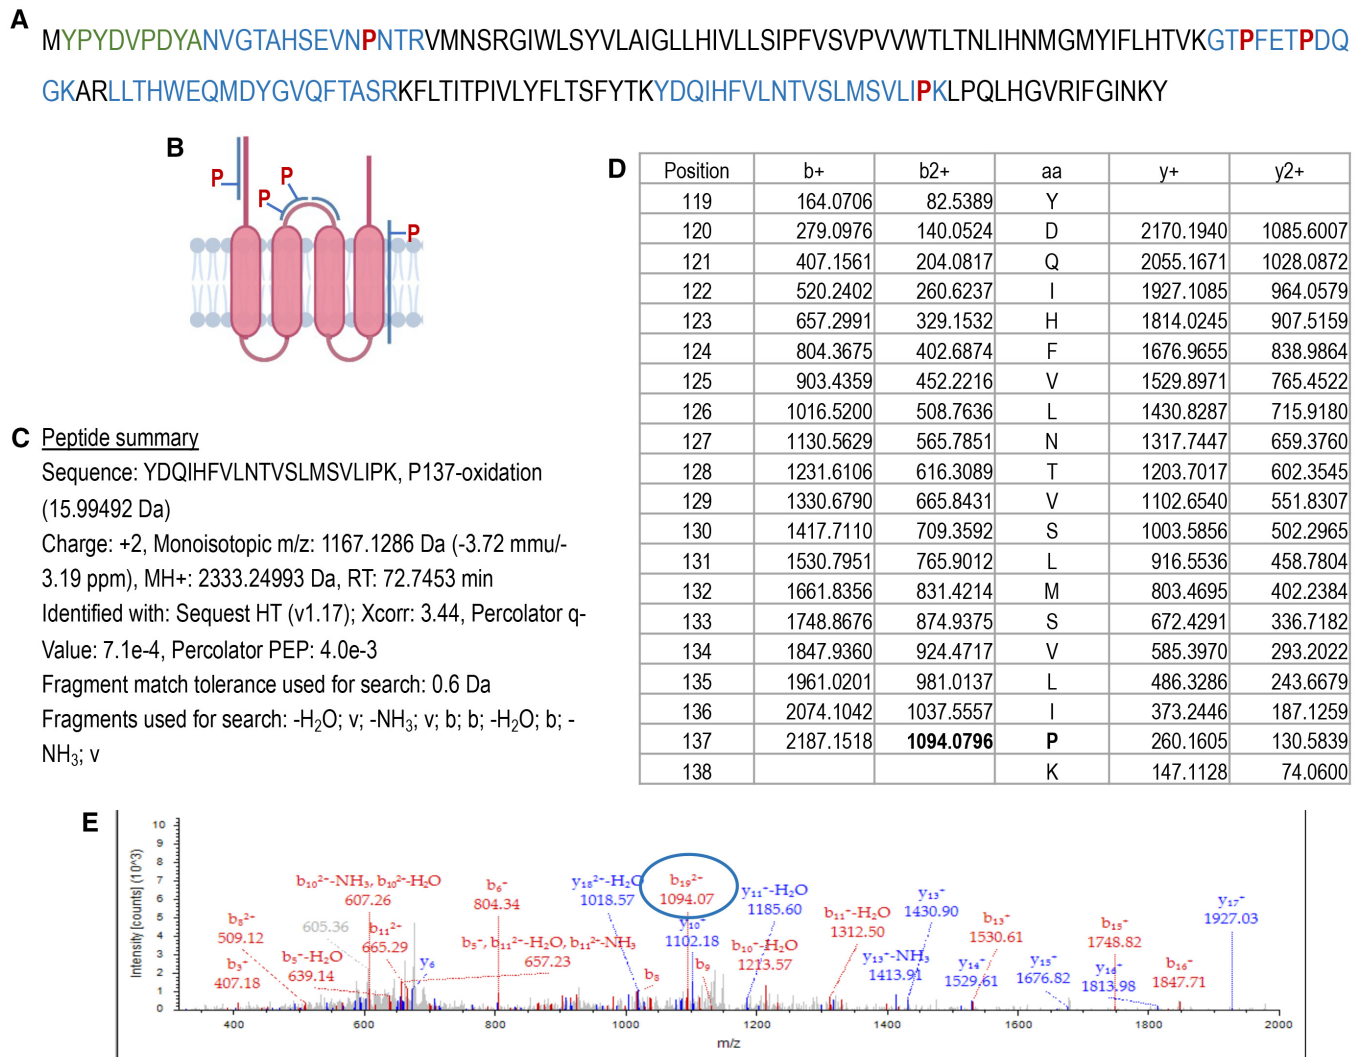

**Figure EV3. ORMDL3 is hydroxylated at P137.**

- A HA-ORMDL3 sequence. In green HA-tag; in blue the peptides identified by MS; in red the prolines identified by MS.  
 B Graphical representation of the peptides identified by MS and prolines localization.  
 C Summary for the peptide containing P137.  
 D Ion masses for the amino acids in the peptide.  
 E Representative mass spectrometry showing the P137 hydroxylated.

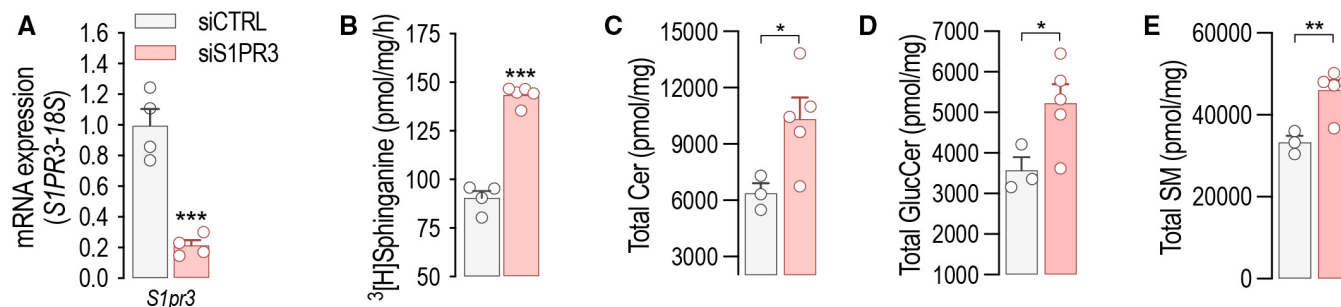

**Figure EV4. S1pr3 deletion leads to increased SPT activity and SL levels.**

A, B (A) RT-PCR for S1pr3 and (B) SPT activity in mEC after siCTRL or siS1PR3 treatment (40 nM, 72 h) ( $n = 4$  biological replicates).

C–E LC–MS/MS quantification of total (C) Ceramide, (D) Glucosylceramide, and (E) Sphingomyelin in murine endothelial cell (mEC) after siCTRL or siS1PR3 treatment (40 nM, 72 h) ( $n = 5$ /group from two independent EC isolations/group; 4 mice/EC isolation).

Data information: Data are expressed as mean  $\pm$  SEM.  $^*P \leq 0.05$ ;  $^{***}P \leq 0.001$ . Statistical significance was determined by unpaired  $t$ -test.

Source data are available online for this figure.

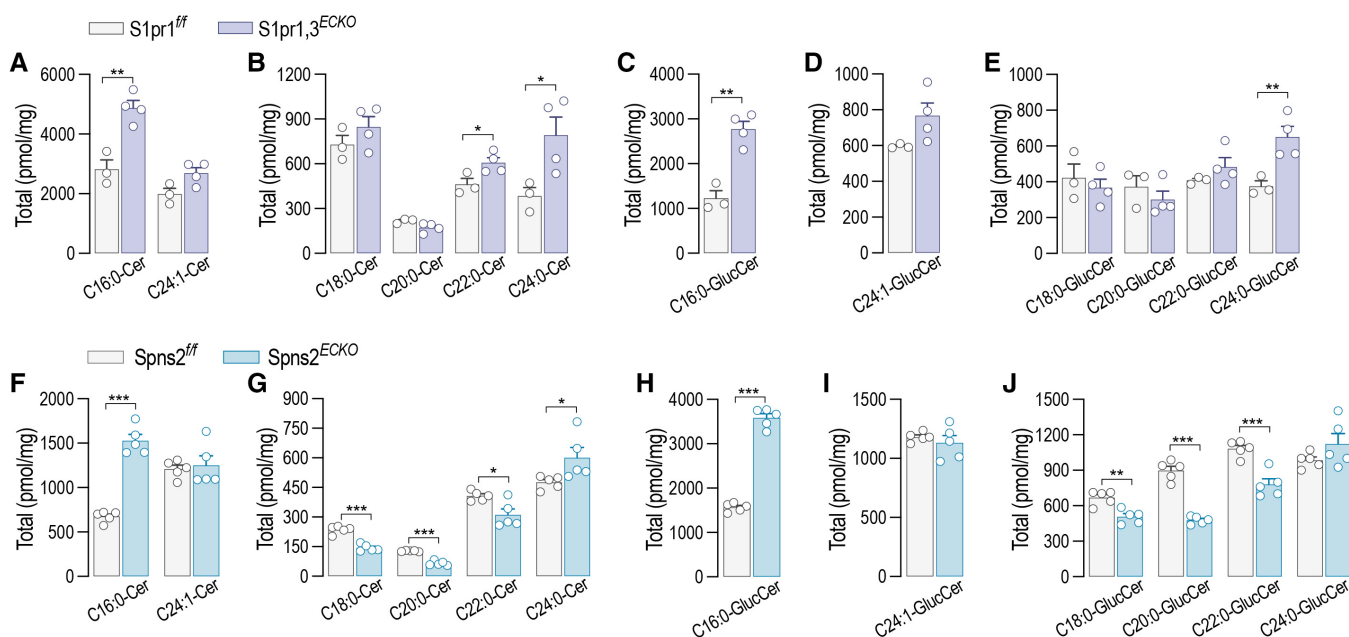

**Figure EV5. Endothelial-derived S1P inhibits SL biosynthesis via S1PR1,3.**

A–E LC–MS/MS quantification of specific (A and B) ceramides and (C–E) glucosylceramides in  $S1pr1,3^{fl/fl}$  and  $S1pr1,3^{ECKO}$  murine endothelial cell (mEC) after 4-OHT (1  $\mu\text{M}$ , 72 h) and siS1PR3 (40 nM, 72 h) treatments ( $n = 5$ /group from two independent EC isolations/group; four mice/EC isolation).

F–J LC–MS/MS quantification of specific (F and G) ceramides and (H–J) glucosylceramides in  $Spns2^{fl/fl}$  and  $Spns2^{ECKO}$  mEC after 4-OHT (1  $\mu\text{M}$ , 72 h) treatment ( $n = 5$ /group from two independent EC isolations/group; four mice/EC isolation).

Data information: Data are expressed as mean  $\pm$  SEM.  $^*P \leq 0.05$ ;  $^{**}P \leq 0.01$ ;  $^{***}P \leq 0.001$ . Statistical significance was determined by unpaired  $t$ -test.

Source data are available online for this figure.
