# Supplementary material
Source: PubMed Central journal article supplement (PMC9827560)
Supplement: EMBR-24-e54689-s008.pdf [file EMBR-24-e54689-s008.pdf]

| pmol lipid per mg protein | Cer(d18:0/16:0) | Cer(d18:0/16:0) | Cer(d18:0/16:0) | Cer(d18:0/18:0) | Cer(d18:0/18:0) | Cer(d18:0/18:0) |
|---------------------------|-----------------|-----------------|-----------------|-----------------|-----------------|-----------------|
|                           | Labeled         | Total           | Total           | Labeled         | Total           | Total           |
| Spns2ECKO                 | 6.080           | 43.222          | 1786.074        | 0.480           | 6.786           | 169.934         |
| Spns2ECKO                 | 4.128           | 32.110          | 1394.153        | 0.536           | 5.311           | 134.944         |
| Spns2ECKO                 | 4.953           | 32.931          | 1383.171        | 0.801           | 5.795           | 127.955         |
| Spns2ECKO                 | 5.082           | 32.795          | 1486.998        | 0.421           | 5.960           | 133.404         |
| Spns2ECKO                 | 6.063           | 41.771          | 1583.708        | 0.614           | 6.437           | 153.702         |
| Spns2iff                  | 3.186           | 43.819          | 702.289         | 0.788           | 12.073          | 241.440         |
| Spns2iff                  | 4.174           | 51.181          | 722.252         | 1.354           | 11.809          | 247.665         |
| Spns2iff                  | 3.137           | 41.831          | 716.769         | 0.845           | 14.381          | 253.724         |
| Spns2iff                  | 2.377           | 41.214          | 570.788         | 0.901           | 13.421          | 201.787         |
| Spns2iff                  | 4.053           | 45.457          | 659.676         | 1.111           | 13.284          | 233.524         |

| Cer(d18:0/20:0) | Cer(d18:0/20:0) | Cer(d18:0/22:0) | Cer(d18:0/22:0) | Cer(d18:0/24:0) | Cer(d18:0/24:0) |
|-----------------|-----------------|-----------------|-----------------|-----------------|-----------------|
| Total           | Total           | Total           | Total           | Total           | Total           |
| 2.867           | 84.177          | 4.881           | 420.309         | 5.472           | 782.531         |
| 2.168           | 57.710          | 2.335           | 258.663         | 2.184           | 538.156         |
| 2.051           | 53.814          | 2.629           | 266.848         | 2.270           | 492.219         |
| 2.682           | 60.147          | 2.601           | 275.490         | 2.789           | 530.553         |
| 3.127           | 71.469          | 3.560           | 333.465         | 4.172           | 654.881         |
| 7.349           | 128.153         | 6.452           | 441.164         | 4.694           | 489.212         |
| 8.410           | 144.297         | 7.216           | 419.750         | 4.488           | 505.925         |
| 5.969           | 123.666         | 6.868           | 385.579         | 4.666           | 509.010         |
| 5.524           | 130.004         | 6.276           | 379.988         | 4.431           | 427.234         |
| 7.137           | 125.133         | 6.311           | 408.426         | 4.304           | 450.703         |

| Cer(d18:0/24:1) | Cer(d18:0/24:1) | Cer(d18:1/14:0) | Cer(d18:1/16:0) | Cer(d18:1/18:0) | Cer(d18:1/20:0) |
|-----------------|-----------------|-----------------|-----------------|-----------------|-----------------|
| Total           | Total           | Total           | Total           | Total           | Total           |
| 7.181           | 1665.784        | 5.223           | 1360.610        | 137.049         | 62.216          |
| 3.529           | 1094.067        | 3.792           | 1016.814        | 110.642         | 42.852          |
| 3.277           | 1094.937        | 4.313           | 1013.006        | 104.292         | 39.042          |
| 3.348           | 1087.303        | 4.116           | 1111.538        | 107.403         | 43.810          |
| 5.805           | 1330.205        | 4.586           | 1177.648        | 124.925         | 52.108          |
| 6.203           | 1275.359        | 2.830           | 584.527         | 207.681         | 99.770          |
| 7.840           | 1309.884        | 3.099           | 600.118         | 212.431         | 112.299         |
| 6.205           | 1223.611        | 2.550           | 601.270         | 220.169         | 98.229          |
| 6.264           | 1056.434        | 2.288           | 471.491         | 173.202         | 109.161         |
| 6.959           | 1176.901        | 2.597           | 545.538         | 203.374         | 99.885          |

| Cer(d18:1/22:0) | Cer(d18:1/24:0) | Cer(d18:1/24:1) | Cer(d18:1/24:1) | Cer(d18:1/26:0) | Cer(d18:1/26:1) |
|-----------------|-----------------|-----------------|-----------------|-----------------|-----------------|
| Total           | Total           | Labeled         | Total           | Total           | Total           |
| 320.836         | 510.548         | 134.533         | 1159.027        | 6.169           | 16.081          |
| 188.464         | 326.006         | 99.901          | 717.996         | 3.137           | 11.787          |
| 196.303         | 303.649         | 106.632         | 687.190         | 3.368           | 11.493          |
| 201.402         | 328.436         | 105.369         | 721.943         | 3.549           | 11.026          |
| 249.782         | 414.043         | 117.634         | 903.883         | 4.697           | 14.092          |
| 385.995         | 422.747         | 145.918         | 1108.401        | 2.915           | 7.424           |
| 360.526         | 431.270         | 146.738         | 1157.547        | 3.214           | 9.128           |
| 334.456         | 431.589         | 144.350         | 1077.863        | 3.279           | 8.643           |
| 334.051         | 367.092         | 118.813         | 929.564         | 2.431           | 6.474           |
| 356.360         | 384.784         | 140.758         | 1023.107        | 2.618           | 6.526           |

| Cer(d18:2/16:0) | Cer(d18:2/18:0) | Cer(d18:2/20:0) | Cer(d18:2/22:0) | Cer(d18:2/24:0) | Cer(d18:2/24:1) | Total    |
|-----------------|-----------------|-----------------|-----------------|-----------------|-----------------|----------|
| Total           | Total           | Total           | Total           | Total           | Total           | Total    |
| 382.242         | 26.099          | 19.094          | 94.591          | 266.511         | 499.576         | 4936.283 |
| 345.228         | 18.990          | 12.690          | 67.864          | 209.966         | 372.542         | 3496.409 |
| 337.234         | 17.869          | 12.721          | 67.917          | 186.301         | 404.470         | 3438.121 |
| 342.665         | 20.041          | 13.654          | 71.487          | 199.328         | 362.012         | 3592.586 |
| 364.289         | 22.340          | 16.234          | 80.124          | 236.666         | 420.518         | 4150.805 |
| 73.943          | 21.687          | 21.033          | 48.717          | 61.770          | 160.755         | 3290.785 |
| 70.954          | 23.425          | 23.588          | 52.009          | 70.167          | 144.497         | 3365.216 |
| 73.668          | 19.174          | 19.468          | 44.254          | 72.755          | 139.544         | 3226.832 |
| 58.083          | 15.164          | 15.319          | 39.661          | 55.711          | 120.606         | 2777.427 |
| 68.681          | 16.866          | 18.112          | 45.755          | 61.615          | 146.835         | 3066.106 |

| pmol lipid per mg protein | Cer(d18:0/16:0) | Cer(d18:0/16:0) | Cer(d18:0/18:0) | Cer(d18:0/18:0) | Cer(d18:0/20:0) | Cer(d18:0/20:0) |
|---------------------------|-----------------|-----------------|-----------------|-----------------|-----------------|-----------------|
| Labeled                   | Labeled         | Labeled         | Labeled         | Labeled         | Labeled         | Labeled         |
| Spm2ECKO                  | 6.680           | 251.084         | 0.480           | 17.111          | 0.494           | 8.211           |
| Spm2ECKO                  | 4.128           | 186.285         | 0.536           | 12.053          | 0.449           | 5.630           |
| Spm2ECKO                  | 4.953           | 192.203         | 0.801           | 13.831          | 0.333           | 5.761           |
| Spm2ECKO                  | 5.082           | 201.647         | 0.421           | 13.075          | 0.398           | 6.336           |
| Spm2ECKO                  | 6.383           | 218.341         | 0.614           | 15.129          | 0.332           | 6.532           |
| Spm2ECKO + SIP            | 3.920           | 142.455         | 0.558           | 8.599           | 0.420           | 3.773           |
| Spm2ECKO + SIP            | 3.090           | 138.340         | 0.267           | 8.628           | 0.094           | 3.197           |
| Spm2ECKO + SIP            | 2.655           | 151.852         | 0.298           | 8.829           | 0.512           | 4.089           |
| Spm2ECKO + SIP            | 2.899           | 145.809         | 0.528           | 9.291           | 0.244           | 4.182           |
| Spm2ECKO + SIP            | 3.798           | 141.717         | 0.381           | 10.013          | 0.143           | 4.054           |
| Spm2ECKO + SIP            | 2.486           | 140.862         | 0.532           | 8.647           | 0.257           | 3.984           |
| Spm2ECKO + SIP            | 3.529           | 140.230         | 0.398           | 8.822           | 0.421           | 3.687           |
| Spm2If                    | 3.186           | 96.726          | 0.788           | 27.296          | 0.920           | 12.756          |
| Spm2If                    | 4.174           | 98.420          | 1.354           | 30.334          | 0.909           | 13.853          |
| Spm2If                    | 3.137           | 98.955          | 0.845           | 28.095          | 0.853           | 12.769          |
| Spm2If                    | 2.377           | 89.983          | 0.901           | 22.282          | 0.752           | 9.777           |
| Spm2If                    | 4.053           | 84.591          | 1.111           | 26.192          | 0.765           | 11.373          |
| Spm2If + SIP              | 2.272           | 43.937          | 0.659           | 10.622          | 0.499           | 5.223           |
| Spm2If + SIP              | 3.071           | 56.990          | 1.626           | 16.496          | 1.339           | 7.548           |
| Spm2If + SIP              | 1.714           | 87.256          | 1.179           | 18.112          | 0.501           | 7.021           |
| Spm2If + SIP              | 7.403           | 61.770          | 7.343           | 23.332          | 6.279           | 17.510          |
| Spm2If + SIP              | 7.412           | 58.227          | 5.287           | 22.045          | 2.547           | 9.492           |
| Spm2If + SIP              | 6.580           | 51.934          | 4.793           | 19.149          | 3.479           | 12.069          |
| Spm2If + SIP              | 6.042           | 54.959          | 2.376           | 21.305          | 3.359           | 11.469          |

| Cer(d18:0/22:0) | Cer(d18:0/22:0) | Cer(d18:0/24:0) | Cer(d18:0/24:0) | Cer(d18:0/24:1) | Cer(d18:0/24:1) |
|-----------------|-----------------|-----------------|-----------------|-----------------|-----------------|
| Labeled         | Labeled         | Labeled         | Labeled         | Labeled         | Labeled         |
| 1.808           | 57.013          | 2.410           | 113.727         | 1.076           | 184.304         |
| 0.735           | 42.295          | 0.593           | 79.550          | 1.002           | 137.552         |
| 0.106           | 43.633          | 0.630           | 79.633          | 1.064           | 147.999         |
| 0.752           | 46.131          | 0.745           | 87.337          | 0.858           | 145.243         |
| 1.355           | 48.303          | 1.681           | 98.059          | 1.913           | 163.839         |
| 0.507           | 29.103          | 0.766           | 56.791          | 1.255           | 98.222          |
| 0.393           | 26.584          | 0.414           | 62.332          | 1.063           | 94.186          |
| 0.534           | 30.875          | 0.721           | 61.766          | 1.023           | 110.861         |
| 0.554           | 32.421          | 0.506           | 56.640          | 0.821           | 112.432         |
| 0.325           | 33.085          | 0.467           | 65.798          | 1.123           | 107.765         |
| 0.437           | 26.342          | 0.643           | 57.814          | 0.858           | 95.122          |
| 0.708           | 28.454          | 0.629           | 55.963          | 0.869           | 100.765         |
| 1.513           | 63.288          | 0.949           | 76.026          | 0.585           | 159.972         |
| 1.317           | 62.058          | 1.104           | 75.951          | 2.108           | 162.491         |
| 1.880           | 59.345          | 1.525           | 87.054          | 1.978           | 158.829         |
| 1.206           | 50.989          | 1.114           | 65.983          | 1.759           | 130.865         |
| 1.091           | 60.474          | 1.066           | 75.907          | 2.205           | 156.831         |
| 0.845           | 28.650          | 1.270           | 45.986          | 1.986           | 78.746          |
| 1.687           | 34.032          | 1.180           | 49.118          | 2.897           | 98.388          |
| 1.319           | 35.890          | 0.835           | 40.561          | 1.538           | 97.248          |
| 8.645           | 49.088          | 5.975           | 57.276          | 6.944           | 103.068         |
| 4.244           | 34.890          | 4.385           | 63.140          | 6.296           | 93.846          |
| 3.513           | 44.568          | 3.862           | 65.125          | 6.184           | 83.629          |
| 2.995           | 34.409          | 2.556           | 47.847          | 4.908           | 87.222          |

| Cer(d18:1/14:0) | Cer(d18:1/16:0) | Cer(d18:1/18:0) | Cer(d18:1/20:0) | Cer(d18:1/22:0) | Cer(d18:1/24:0) |
|-----------------|-----------------|-----------------|-----------------|-----------------|-----------------|
| Labeled         | Labeled         | Labeled         | Labeled         | Labeled         | Labeled         |
| 149.841         | 149.841         | 149.841         | 149.841         | 149.841         | 149.841         |
| 0.185           | 144.181         | 9.893           | 3.767           | 32.355          | 53.885          |
| 0.229           | 150.033         | 11.535          | 4.167           | 32.640          | 53.097          |
| 0.230           | 158.724         | 10.936          | 4.537           | 35.301          | 60.419          |
| 0.261           | 171.947         | 12.813          | 4.443           | 35.437          | 64.457          |
| 0.237           | 108.444         | 6.468           | 6.287           | 16.217          | 37.605          |
| 0.067           | 103.146         | 6.913           | 2.023           | 19.711          | 39.810          |
| 0.178           | 118.390         | 6.942           | 2.594           | 22.899          | 38.370          |
| 0.213           | 112.531         | 7.334           | 2.761           | 23.464          | 36.888          |
| 0.104           | 107.818         | 8.319           | 2.792           | 24.145          | 40.179          |
| 0.167           | 108.607         | 6.758           | 6.236           | 19.444          | 36.730          |
| 0.179           | 108.639         | 6.994           | 2.110           | 21.212          | 37.660          |
| 0.335           | 87.386          | 24.428          | 9.941           | 55.052          | 65.283          |
| 0.374           | 88.418          | 26.650          | 10.561          | 55.682          | 67.319          |
| 0.243           | 89.530          | 25.771          | 9.921           | 51.195          | 67.577          |
| 0.283           | 93.856          | 20.024          | 8.658           | 45.092          | 53.462          |
| 0.266           | 75.482          | 23.597          | 8.781           | 53.585          | 59.033          |
| 0.198           | 38.157          | 8.623           | 2.996           | 22.412          | 27.748          |
| 0.429           | 48.453          | 12.799          | 4.007           | 27.990          | 33.068          |
| 0.394           | 55.424          | 12.723          | 4.979           | 30.081          | 31.395          |
| 1.212           | 45.359          | 11.703          | 6.359           | 32.547          | 32.709          |
| 1.072           | 43.170          | 10.625          | 3.925           | 23.630          | 29.751          |
| 0.876           | 39.914          | 11.961          | 4.196           | 31.355          | 35.473          |
| 0.688           | 43.610          | 15.901          | 6.033           | 25.308          | 28.958          |

| Cer(d18:1/24:1) | Cer(d18:1/26:0) | Cer(d18:1/26:1) | Cer(d18:2/18:0) | Cer(d18:2/18:0) | Cer(d18:2/20:0) |
|-----------------|-----------------|-----------------|-----------------|-----------------|-----------------|
| Labeled         | Labeled         | Labeled         | Labeled         | Labeled         | Labeled         |
| 134.533         | 0.968           | 3.095           | 45.323          | 2.616           | 1.975           |
| 99.901          | 0.708           | 2.237           | 37.976          | 1.624           | 1.414           |
| 106.632         | 0.701           | 2.236           | 37.217          | 1.496           | 1.261           |
| 105.365         | 0.873           | 2.363           | 37.841          | 1.718           | 1.176           |
| 117.634         | 0.778           | 2.558           | 40.331          | 1.702           | 1.756           |
| 70.418          | 0.711           | 1.655           | 31.591          | 1.573           | 1.156           |
| 69.012          | 0.314           | 1.638           | 32.104          | 1.448           | 1.079           |
| 77.695          | 0.543           | 1.979           | 30.808          | 1.589           | 0.983           |
| 78.334          | 0.430           | 1.430           | 30.380          | 1.429           | 1.176           |
| 75.530          | 0.291           | 2.100           | 29.562          | 1.513           | 1.120           |
| 67.676          | 0.692           | 1.461           | 29.770          | 1.357           | 1.231           |
| 71.907          | 0.588           | 1.839           | 28.063          | 1.430           | 1.156           |
| 145.918         | 0.904           | 1.846           | 5.154           | 2.080           | 1.895           |
| 146.738         | 1.073           | 1.919           | 5.828           | 2.330           | 2.383           |
| 144.350         | 0.839           | 1.867           | 6.288           | 1.479           | 1.955           |
| 118.813         | 0.777           | 1.189           | 4.440           | 1.357           | 1.368           |
| 140.758         | 0.746           | 1.330           | 5.057           | 1.484           | 1.827           |
| 67.128          | 0.695           | 1.140           | 3.509           | 1.341           | 1.728           |
| 83.870          | 1.060           | 1.515           | 5.465           | 2.071           | 2.203           |
| 86.226          | 0.781           | 0.890           | 5.117           | 2.210           | 1.541           |
| 81.779          | 5.640           | 4.933           | 9.028           | 4.285           | 4.880           |
| 73.588          | 3.347           | 3.141           | 7.645           | 6.134           | 3.019           |
| 76.039          | 3.592           | 2.939           | 5.440           | 2.395           | 4.394           |
| 71.001          | 2.686           | 1.806           | 5.307           | 3.028           | 2.076           |

| Cer(d18:2/22:0) | Cer(d18:2/22:0) | Cer(d18:2/24:0) | Cer(d18:2/24:1) | Labeled |
|-----------------|-----------------|-----------------|-----------------|---------|
| Labeled         | Total           | Labeled         | Labeled         | Labeled |
| 13.111          | 94.591          | 35.853          | 48.696          | 833.775 |
| 9.195           | 87.864          | 28.071          | 36.649          | 483.699 |
| 10.357          | 87.917          | 25.926          | 40.302          | 486.317 |
| 10.078          | 71.487          | 26.173          | 39.016          | 503.235 |
| 11.511          | 80.124          | 31.921          | 44.291          | 553.799 |
| 7.380           | 76.035          | 18.421          | 26.549          | 341.547 |
| 6.481           | 74.507          | 22.308          | 24.111          | 325.995 |
| 7.441           | 82.828          | 22.675          | 31.943          | 370.771 |
| 8.403           | 81.849          | 19.245          | 32.777          | 383.007 |
| 8.614           | 87.055          | 25.152          | 31.113          | 364.387 |
| 6.460           | 72.002          | 21.441          | 26.589          | 324.974 |
| 6.535           | 80.650          | 17.574          | 27.989          | 340.538 |
| 5.822           | 48.717          | 9.793           | 12.468          | 437.248 |
| 5.059           | 52.009          | 7.528           | 13.645          | 446.473 |
| 6.270           | 44.254          | 17.952          | 12.501          | 447.996 |
| 4.691           | 39.661          | 11.407          | 10.294          | 352.833 |
| 5.798           | 43.865          | 15.801          | 13.867          | 411.610 |
| 5.193           | 47.804          | 16.667          | 9.632           | 214.637 |
| 4.355           | 67.730          | 14.870          | 11.621          | 285.577 |
| 4.489           | 56.838          | 8.331           | 9.483           | 256.132 |
| 7.896           | 55.243          | 18.591          | 14.345          | 323.829 |
| 6.916           | 60.437          | 29.284          | 13.862          | 289.290 |
| 9.658           | 61.818          | 25.690          | 11.406          | 293.838 |
| 6.106           | 53.634          | 16.333          | 11.313          | 262.391 |

| <b>pmol lipid per mg protein</b> | <b>GlcCer(d18:1/16:0)</b> | <b>GlcCer(d18:1/18:0)</b> | <b>GlcCer(d18:1/20:0)</b> | <b>GlcCer(d18:1/22:0)</b> | <b>GlcCer(d18:1/24:0)</b> | <b>GlcCer(d18:1/24:1)</b> |              |  |
|----------------------------------|---------------------------|---------------------------|---------------------------|---------------------------|---------------------------|---------------------------|--------------|--|
|                                  | <b>Total</b>              | <b>Total</b>              | <b>Total</b>              | <b>Total</b>              | <b>Total</b>              | <b>Total</b>              | <b>Total</b> |  |
| Spns2ECKO                        | 3751.559                  | 584.722                   | 514.557                   | 956.182                   | 1403.031                  | 1310.746                  | 8520.797     |  |
| Spns2ECKO                        | 3458.671                  | 455.779                   | 438.332                   | 642.385                   | 926.479                   | 942.997                   | 6864.642     |  |
| Spns2ECKO                        | 3664.832                  | 523.726                   | 480.836                   | 761.068                   | 1033.201                  | 1145.649                  | 7609.312     |  |
| Spns2ECKO                        | 3211.967                  | 431.712                   | 421.810                   | 700.749                   | 912.066                   | 1012.739                  | 6691.043     |  |
| Spns2ECKO                        | 3794.778                  | 532.337                   | 520.468                   | 819.606                   | 1292.760                  | 1229.402                  | 8189.352     |  |
|                                  |                           |                           |                           |                           |                           |                           |              |  |
|                                  |                           |                           |                           |                           |                           |                           |              |  |
| Spns2f/f                         | 1593.542                  | 702.001                   | 931.091                   | 1188.911                  | 1056.875                  | 1167.429                  | 6639.850     |  |
| Spns2f/f                         | 1627.174                  | 711.859                   | 988.182                   | 1142.701                  | 1001.344                  | 1195.045                  | 6666.306     |  |
| Spns2f/f                         | 1676.562                  | 719.875                   | 938.561                   | 1090.489                  | 999.869                   | 1293.483                  | 6718.840     |  |
| Spns2f/f                         | 1432.472                  | 573.889                   | 758.960                   | 948.042                   | 901.250                   | 1124.554                  | 5739.166     |  |
| Spns2f/f                         | 1506.336                  | 633.164                   | 897.183                   | 1052.936                  | 946.530                   | 1151.084                  | 6187.233     |  |

| pmol lipid per mg protein | GlcCer(d18:1/16:0) | GlcCer(d18:1/18:0) | GlcCer(d18:1/20:0) | GlcCer(d18:1/22:0) | GlcCer(d18:1/24:0) | GlcCer(d18:1/24:1) |         |
|---------------------------|--------------------|--------------------|--------------------|--------------------|--------------------|--------------------|---------|
|                           | Labeled            | Labeled            | Labeled            | Labeled            | Labeled            | Labeled            | Labeled |
| Spns2ECKO                 | 185.261            | 9.927              | 6.868              | 17.173             | 21.139             | 39.833             | 280.201 |
| Spns2ECKO                 | 154.539            | 7.265              | 3.978              | 14.401             | 17.142             | 28.749             | 226.073 |
| Spns2ECKO                 | 170.541            | 8.830              | 5.696              | 17.821             | 21.063             | 34.833             | 258.784 |
| Spns2ECKO                 | 160.494            | 6.824              | 5.052              | 15.543             | 17.780             | 29.894             | 235.587 |
| Spns2ECKO                 | 181.972            | 9.821              | 4.115              | 18.978             | 21.375             | 34.844             | 271.104 |
| SpnsECKO + S1P            | 137.744            | 5.619              | 3.671              | 11.260             | 10.438             | 19.977             | 188.709 |
| SpnsECKO + S1P            | 131.137            | 4.277              | 1.843              | 7.415              | 10.986             | 19.226             | 174.883 |
| SpnsECKO + S1P            | 112.904            | 7.345              | 3.920              | 12.222             | 14.949             | 25.993             | 177.334 |
| SpnsECKO + S1P            | 124.063            | 5.567              | 3.247              | 15.235             | 18.702             | 29.959             | 196.772 |
| SpnsECKO + S1P            | 129.005            | 4.483              | 3.321              | 12.629             | 18.373             | 25.639             | 193.450 |
| SpnsECKO + S1P            | 116.079            | 5.692              | 2.714              | 10.461             | 14.432             | 25.404             | 174.783 |
| SpnsECKO + S1P            | 123.505            | 5.454              | 3.465              | 12.347             | 15.483             | 26.103             | 186.356 |
| Spns2fff                  | 43.79              | 8.92               | 4.93               | 18.05              | 9.74               | 19.51              | 104.941 |
| Spns2fff                  | 38.78              | 4.79               | 4.08               | 15.34              | 6.78               | 16.54              | 86.307  |
| Spns2fff                  | 49.39              | 6.35               | 5.84               | 12.79              | 8.88               | 21.95              | 105.209 |
| Spns2fff                  | 56.36              | 8.41               | 5.78               | 22.12              | 10.67              | 27.61              | 130.950 |
| Spns2fff                  | 52.050             | 7.326              | 5.304              | 17.852             | 9.866              | 19.371             | 111.768 |
| Spns2fff + S1P            | 39.48              | 3.79               | 2.95               | 12.25              | 5.56               | 19.60              | 83.623  |
| Spns2fff + S1P            | 39.88              | 5.50               | 3.87               | 13.10              | 7.14               | 17.57              | 87.066  |
| Spns2fff + S1P            | 46.81              | 3.65               | 3.89               | 14.16              | 7.18               | 21.97              | 97.663  |
| Spns2fff + S1P            | 41.88              | 4.59               | 3.22               | 7.82               | 6.94               | 15.85              | 80.292  |
| Spns2fff + S1P            | 40.319             | 7.099              | 6.412              | 11.106             | 7.083              | 20.784             | 92.803  |
| Spns2fff + S1P            | 39.562             | 6.702              | 6.286              | 12.331             | 11.532             | 18.376             | 94.789  |
| Spns2fff + S1P            | 34.158             | 3.853              | 2.805              | 9.744              | 6.265              | 17.225             | 74.052  |
