# Supplementary material
Source: PubMed Central journal article supplement (PMC9827560)
Supplement: EMBR-24-e54689-s009.pdf [file EMBR-24-e54689-s009.pdf]

FIGURE 3A

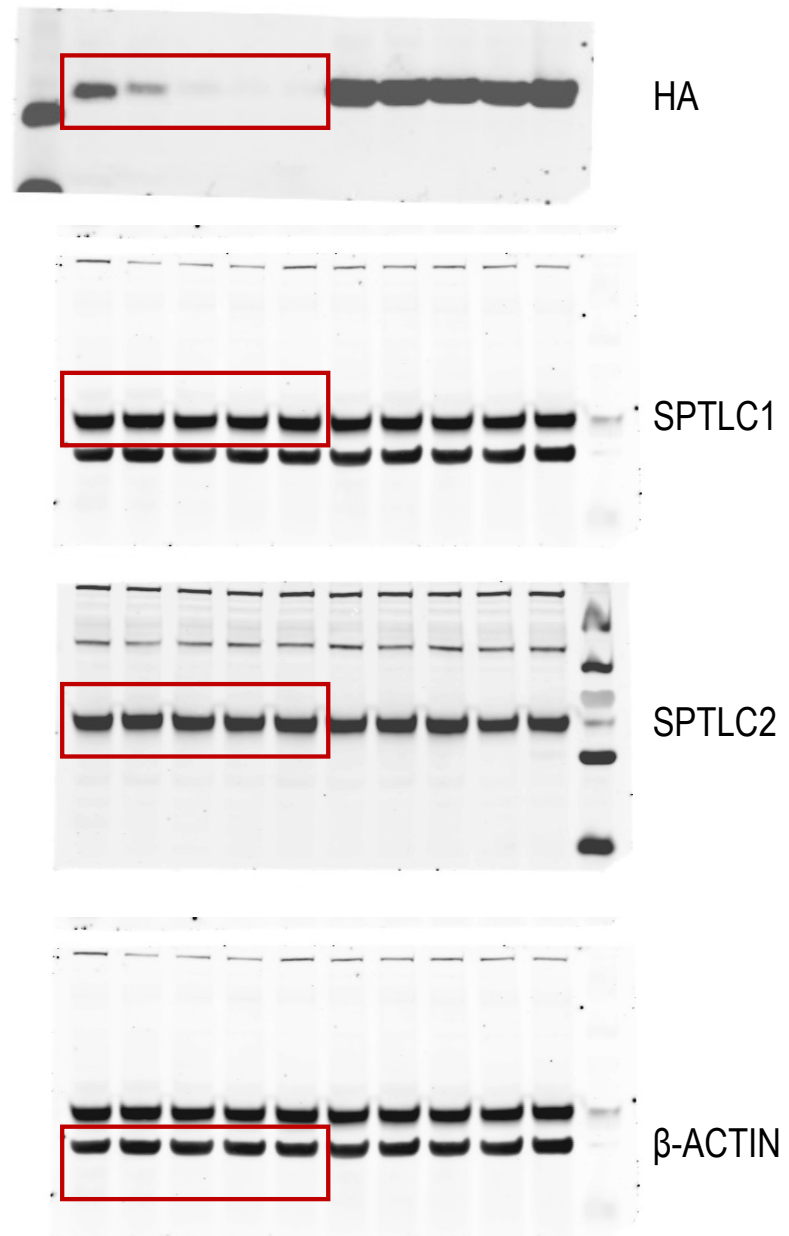

FIGURE 3C

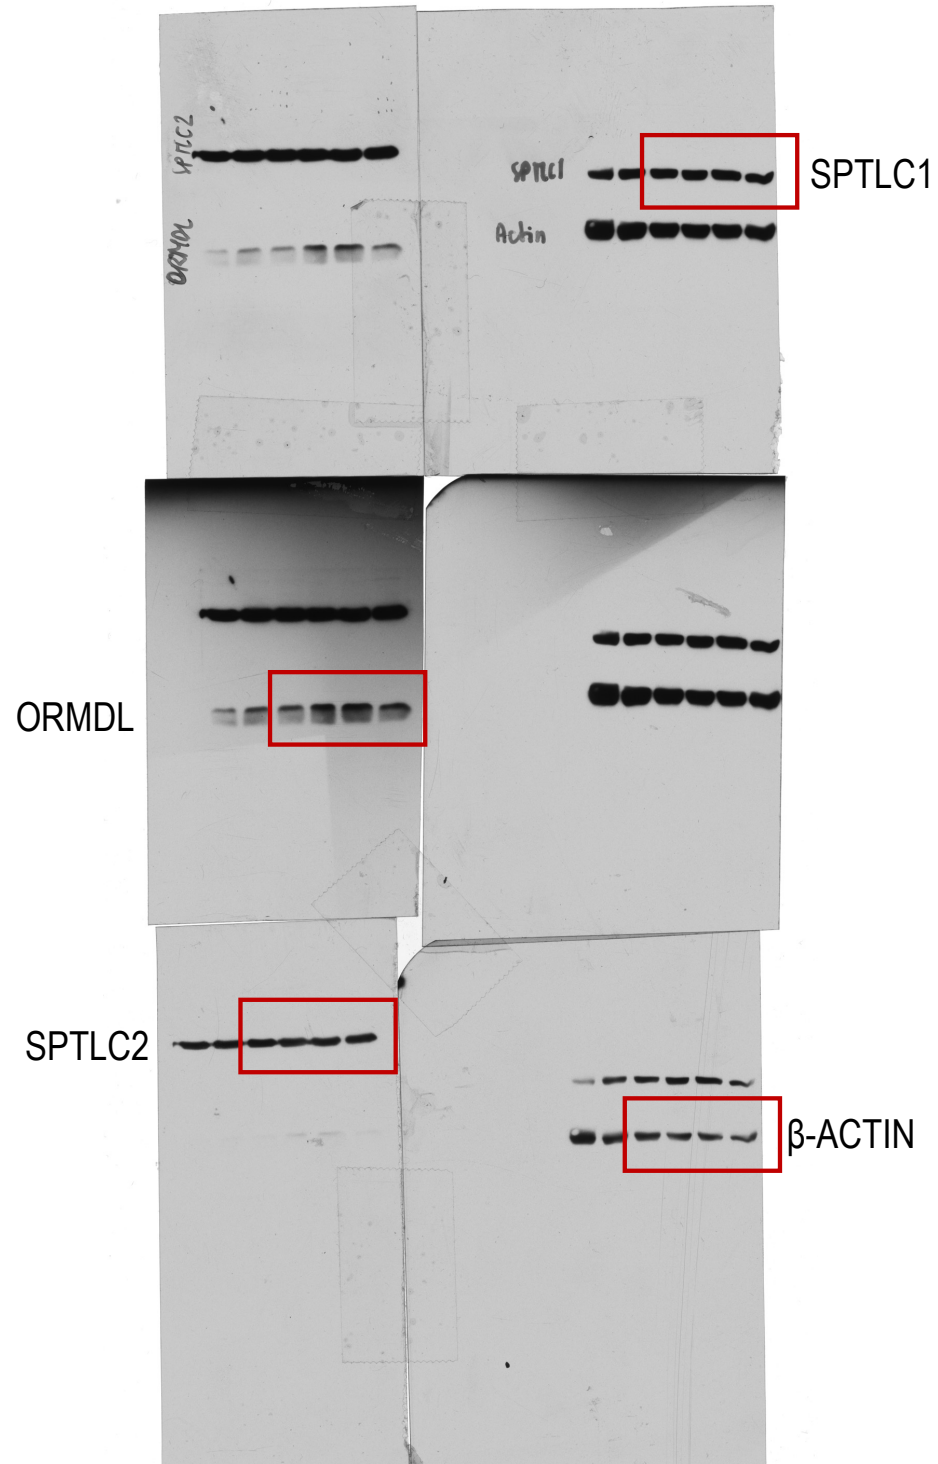

FIGURE 3D

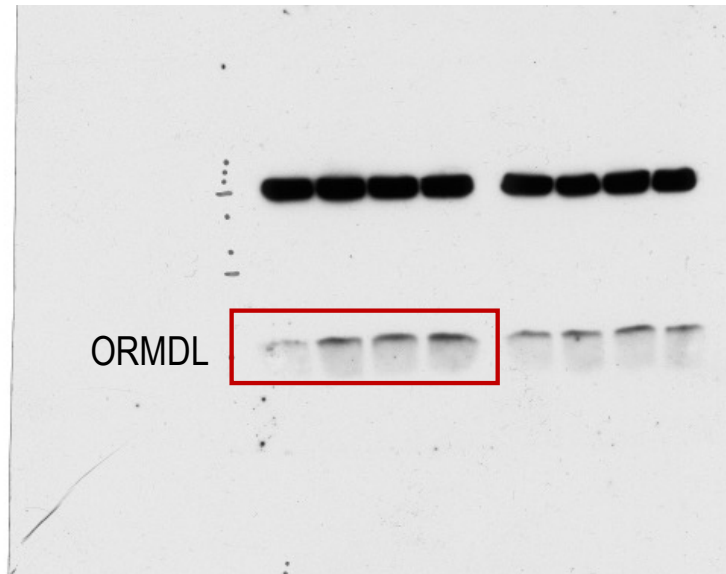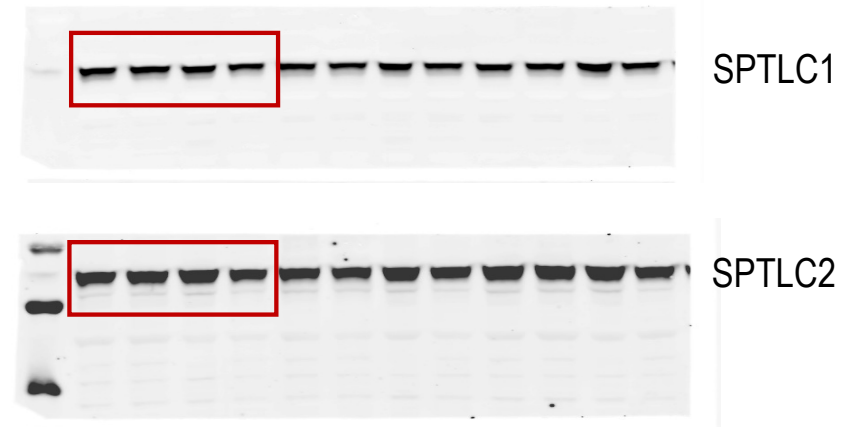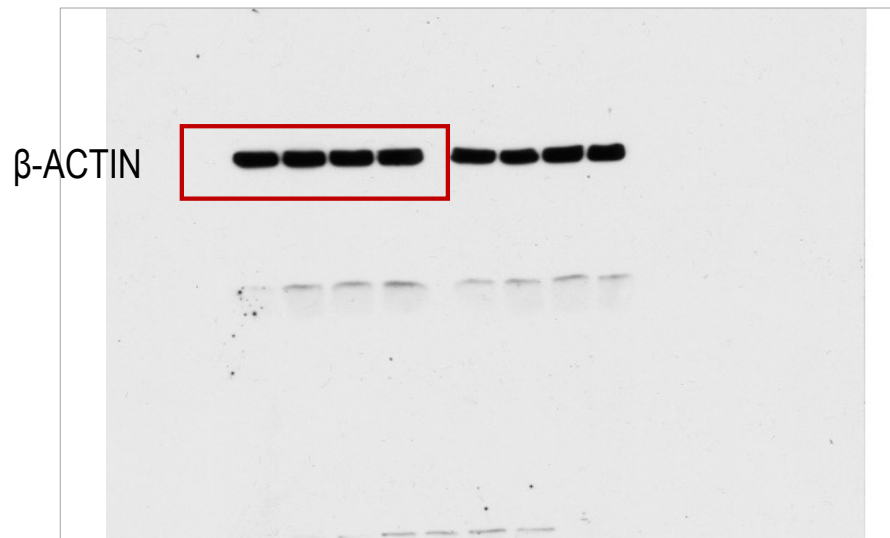

FIGURE 3E

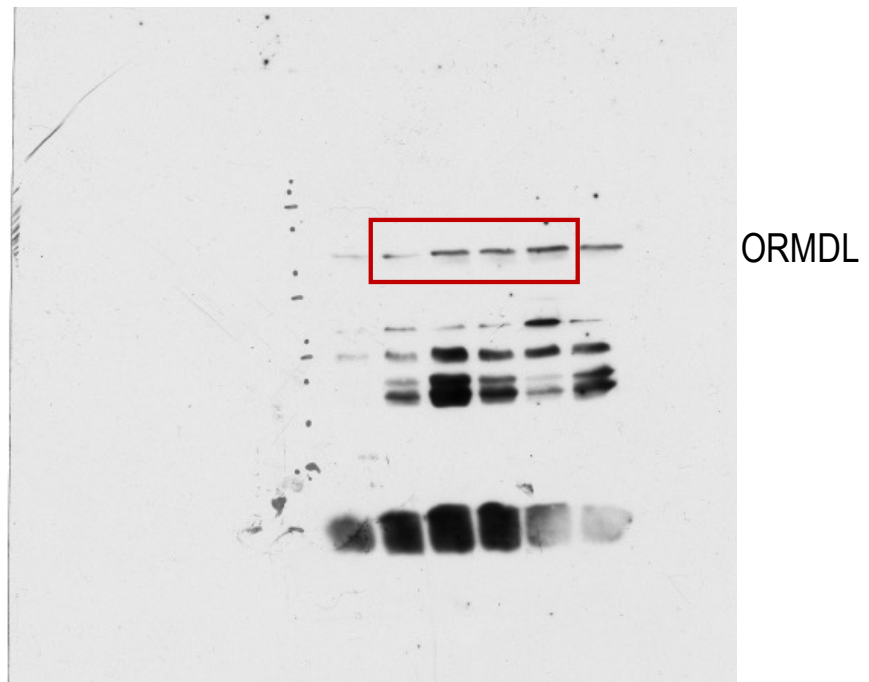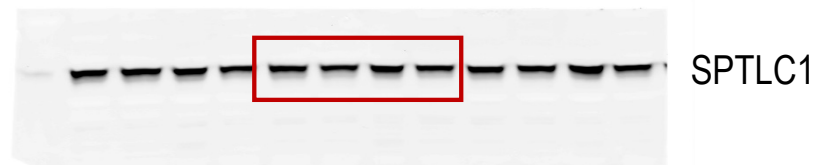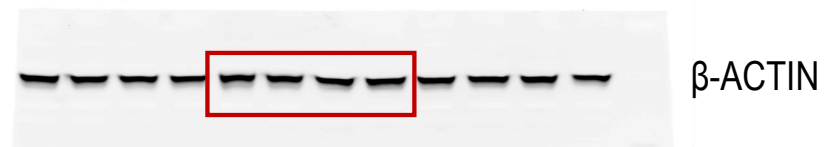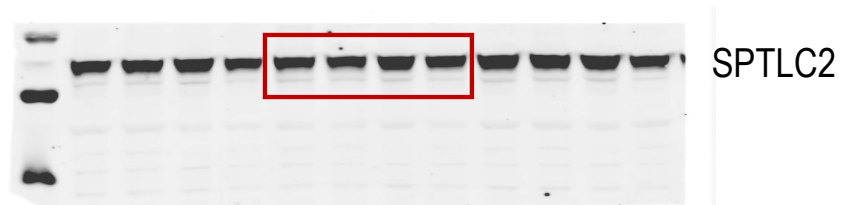

FIGURE 3F

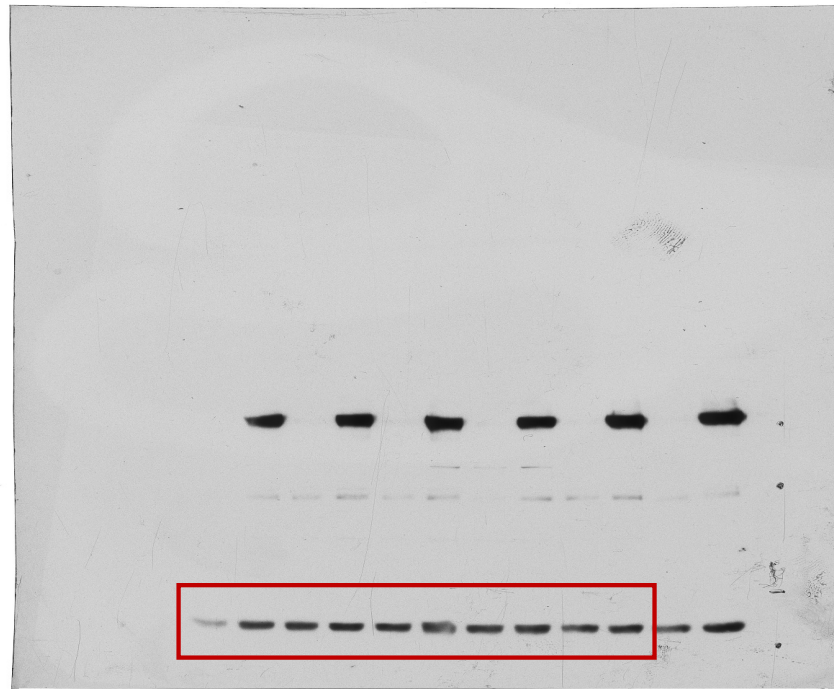

ORMDLs

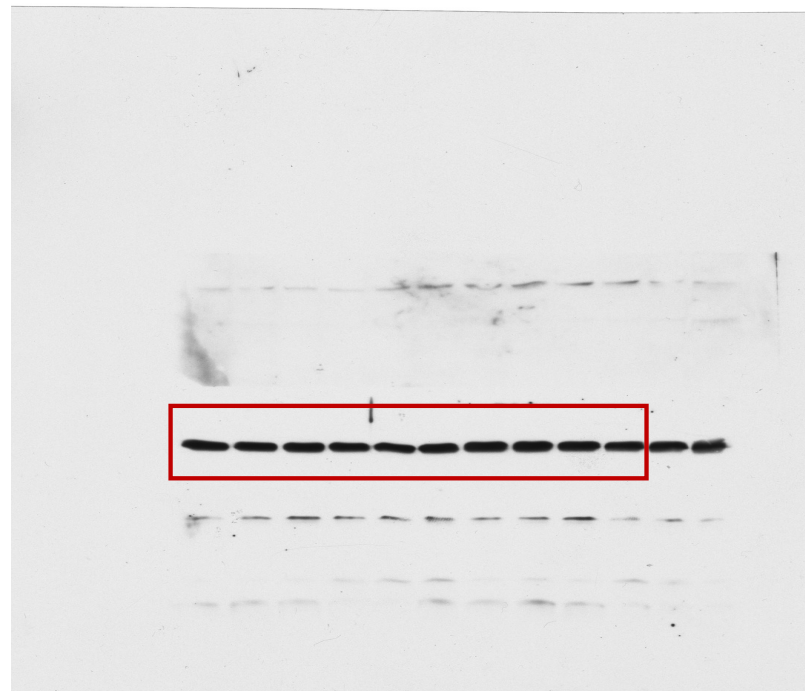

$\beta$ -ACTIN

FIGURE 3G

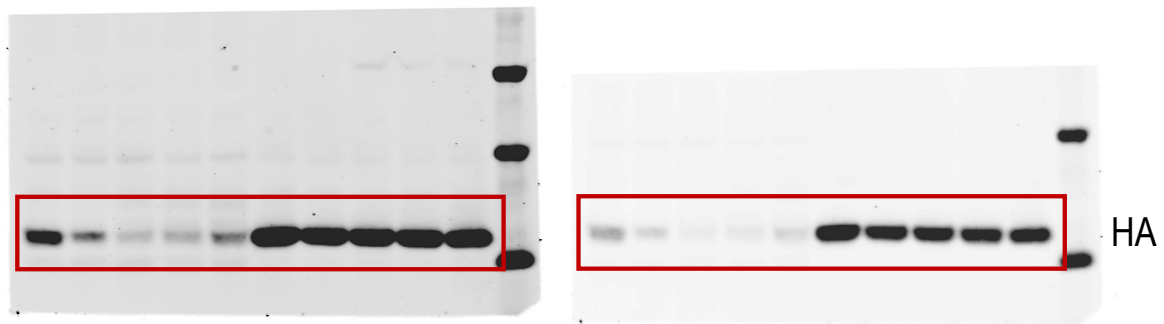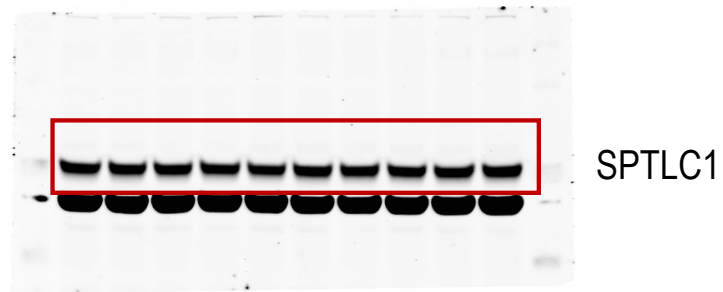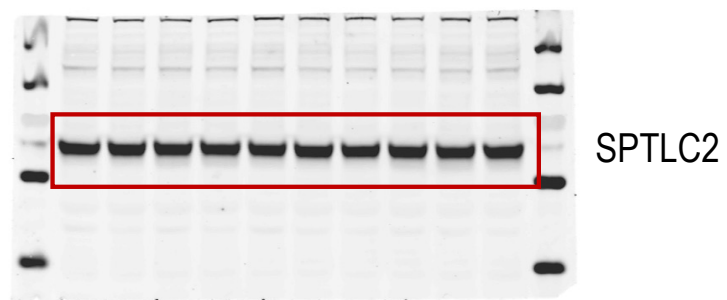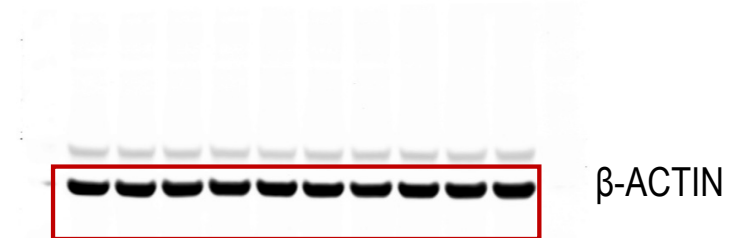

FIGURE 3I

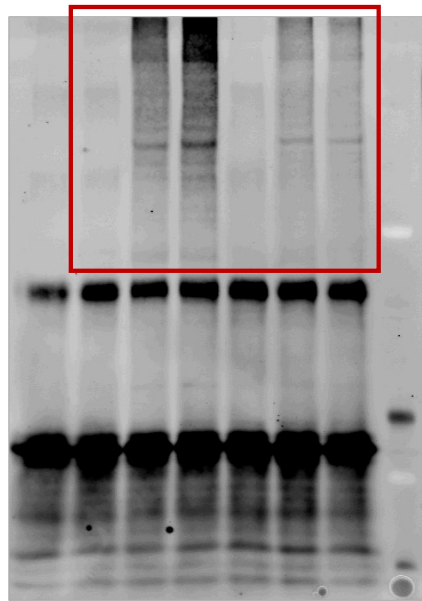

Ubiquitin

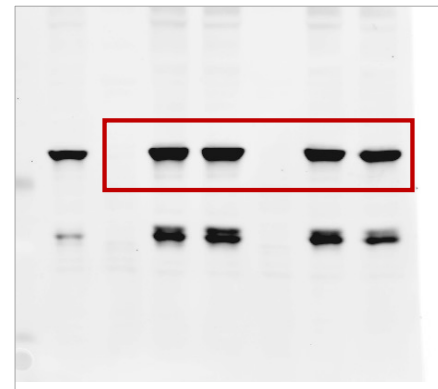

GFP

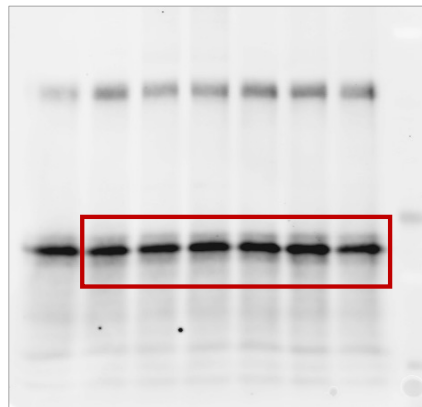

HA-ORMDL3
