# Supplementary material
Source: PubMed Central journal article supplement (PMC9827560)

FIGURE 2A

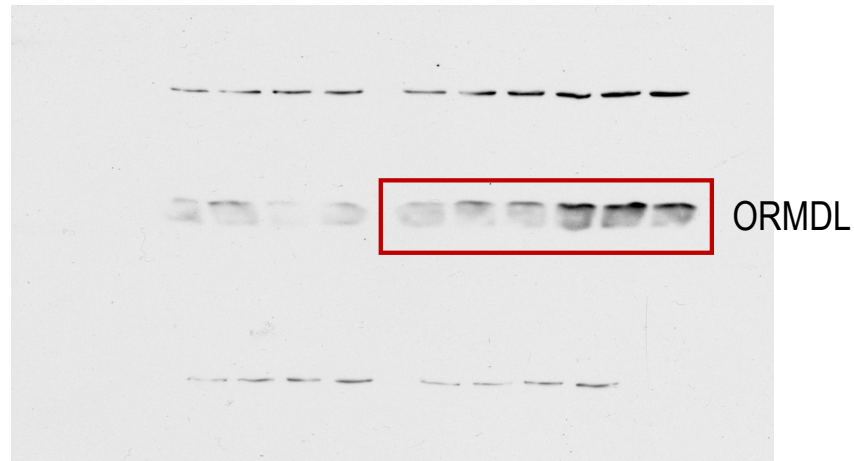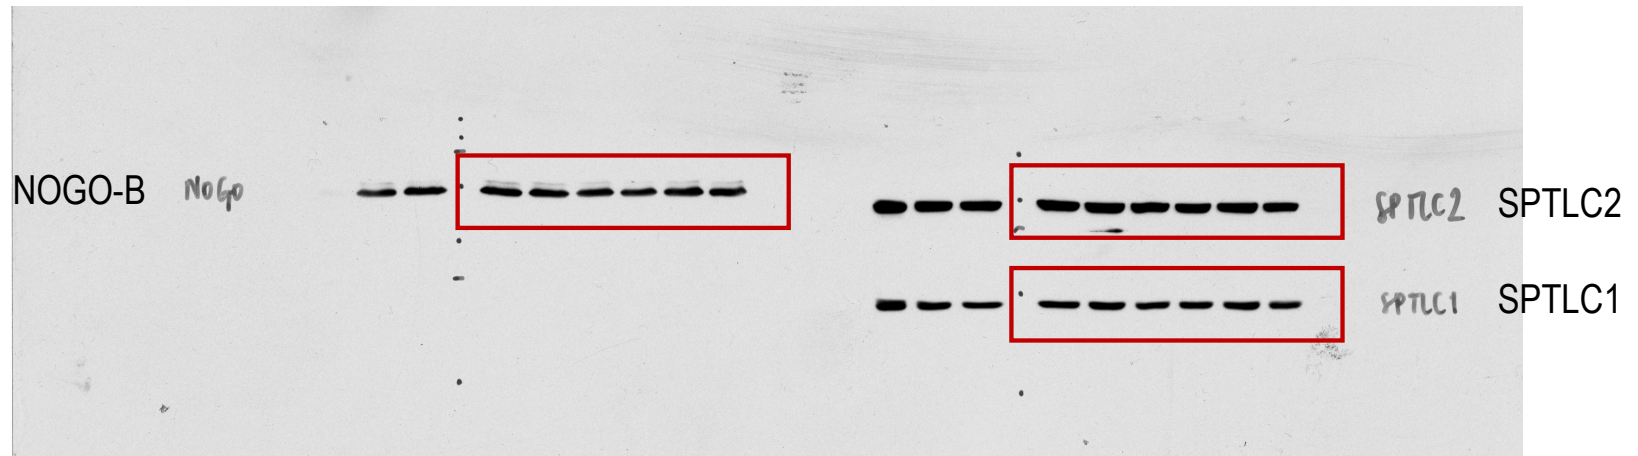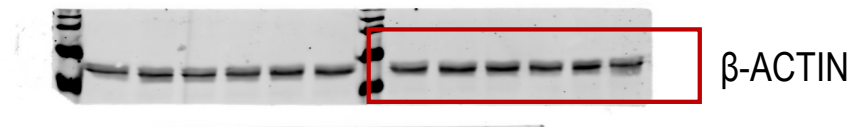

FIGURE 2C

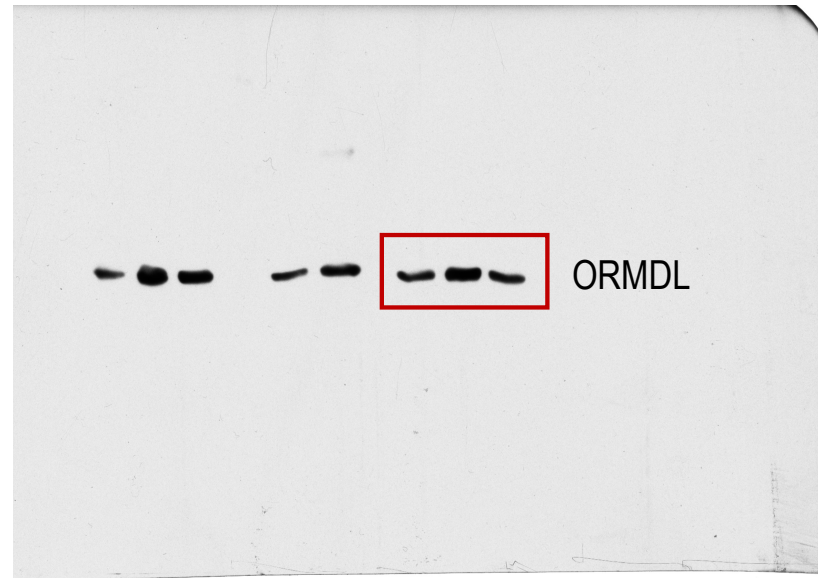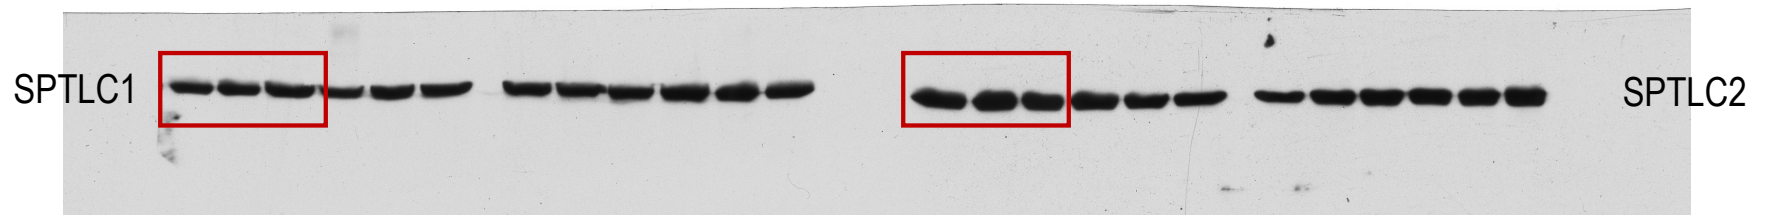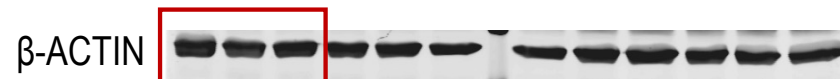

FIGURE 2E

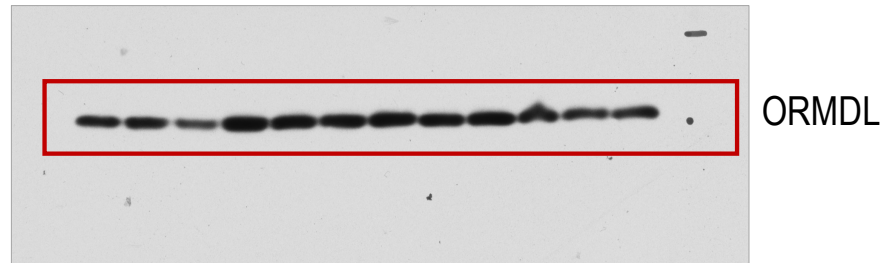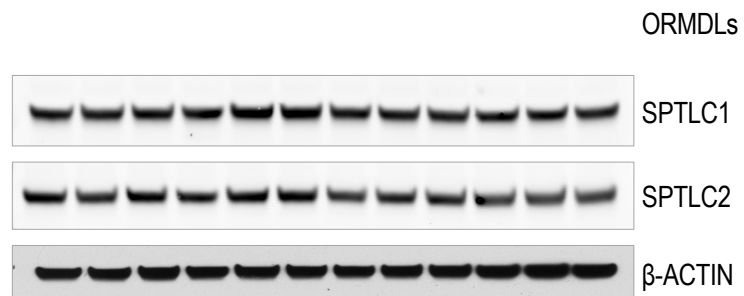

FIGURE 2G

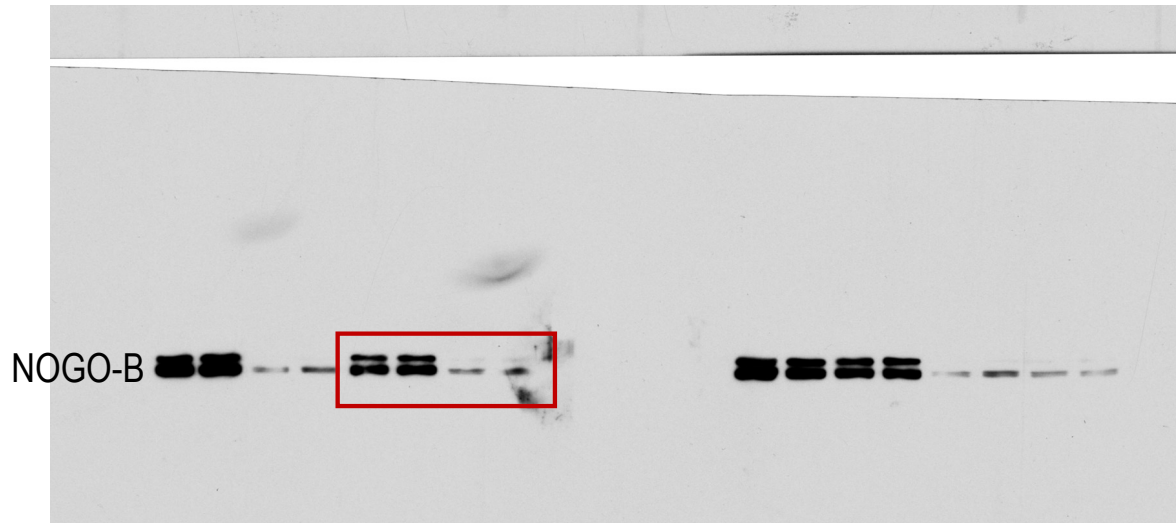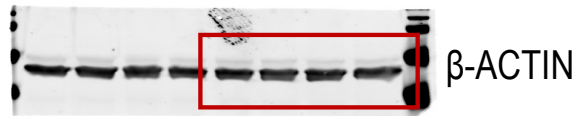



FIGURE 2H

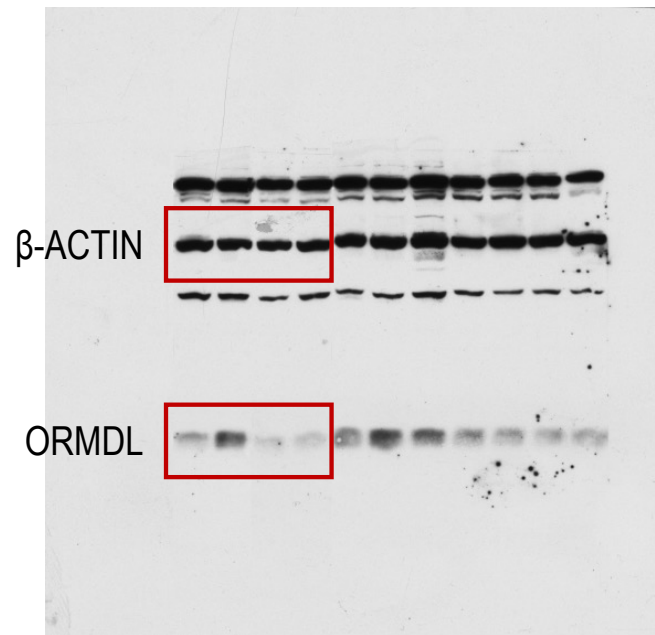

FIGURE 2

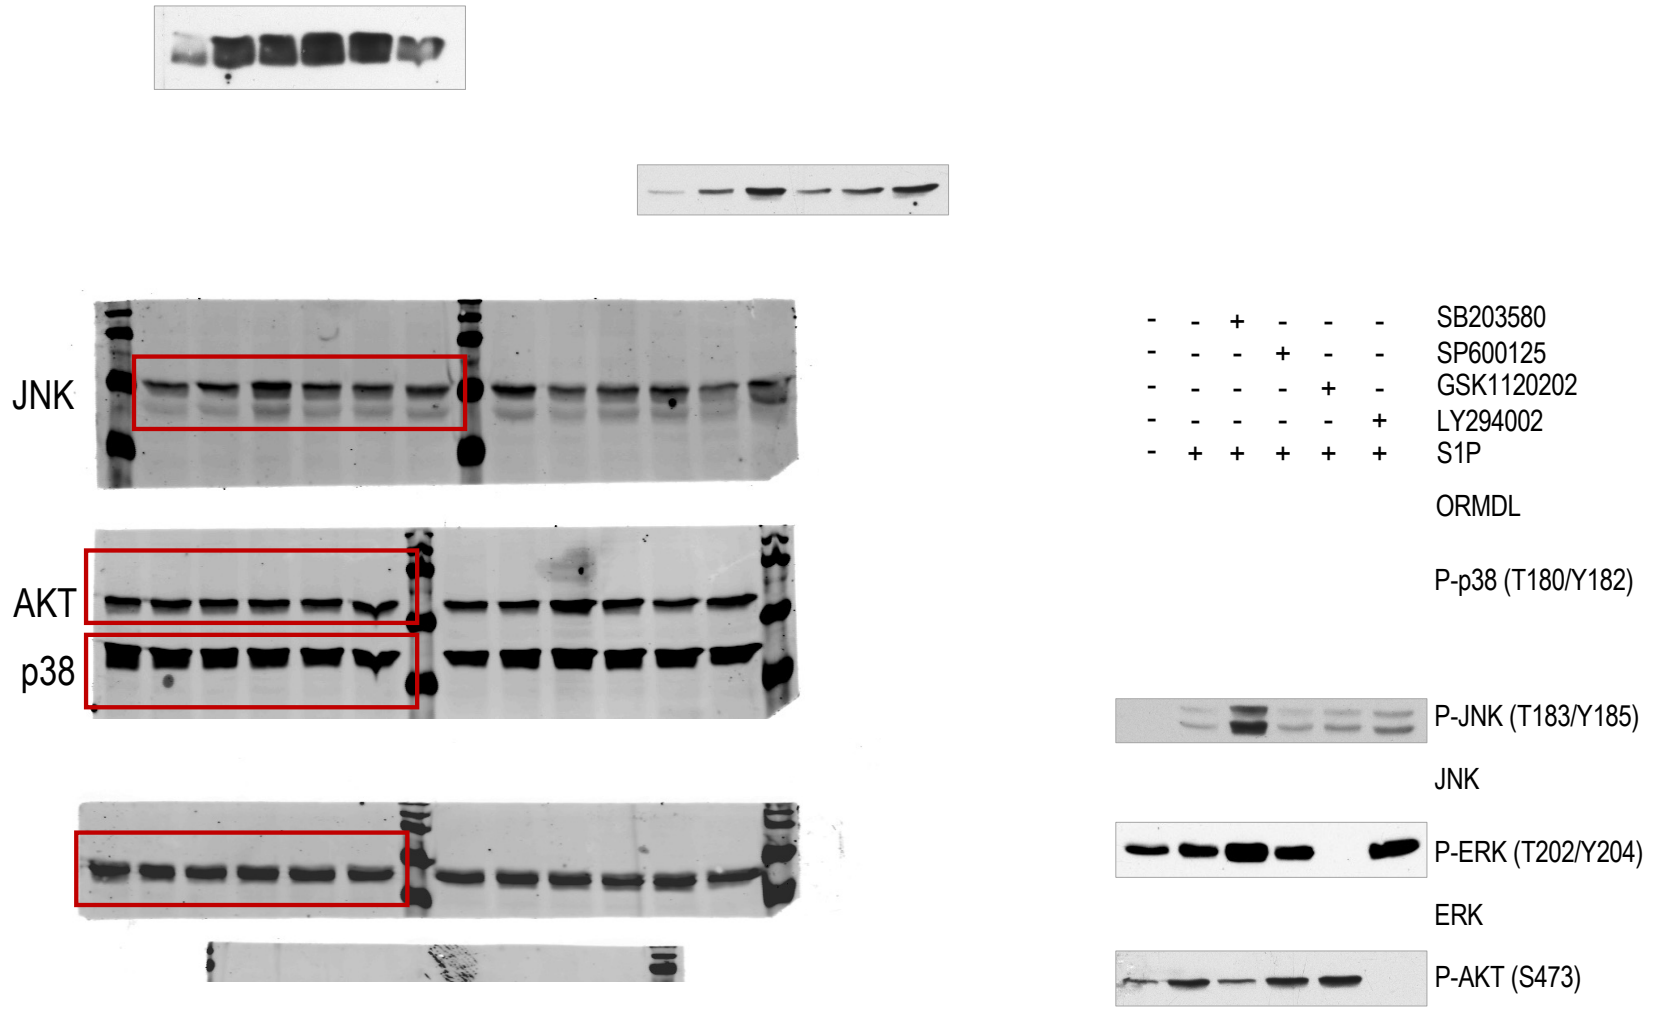

Supplement: EMBR-24-e54689-s005.pdf [file EMBR-24-e54689-s005.pdf]

FIGURE 4A

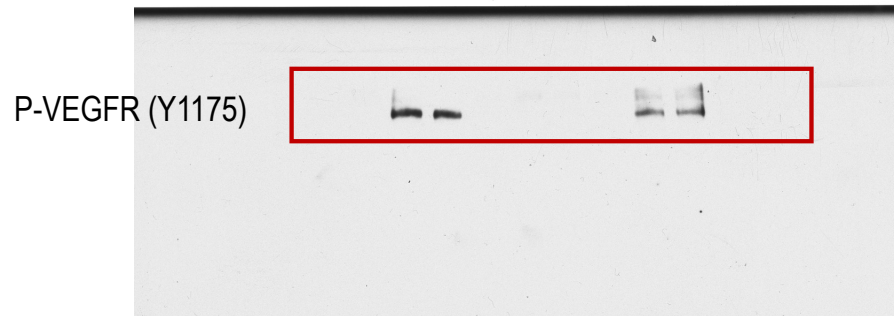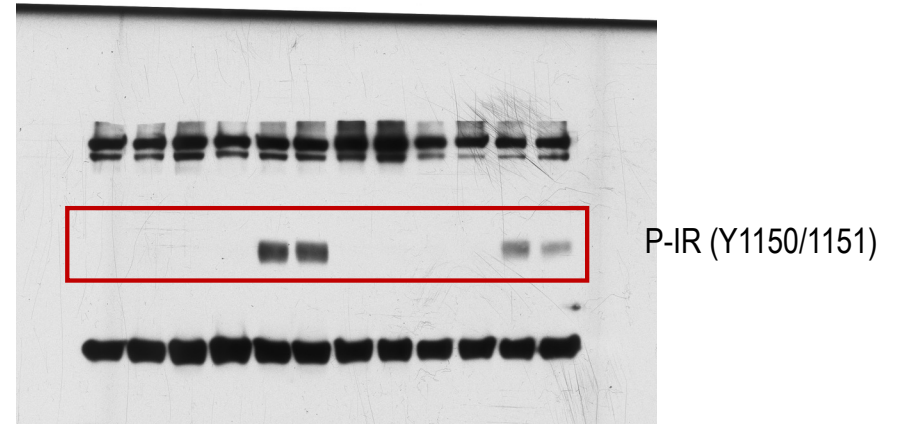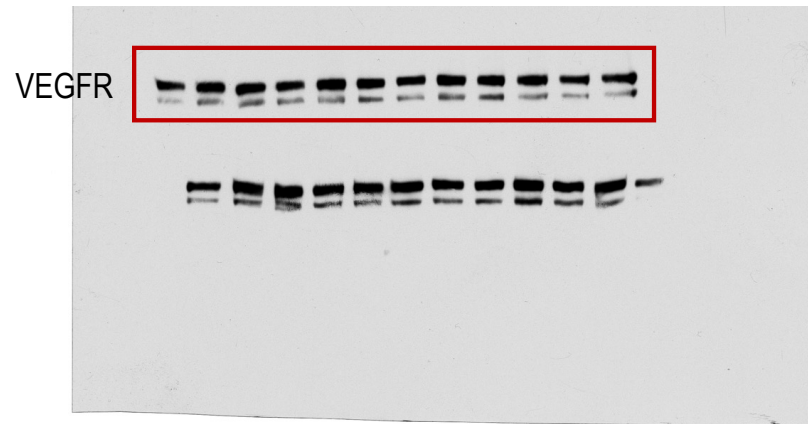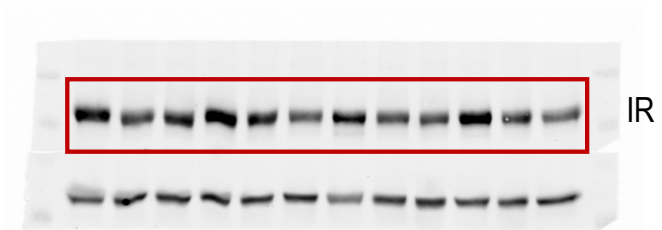

FIGURE 4A

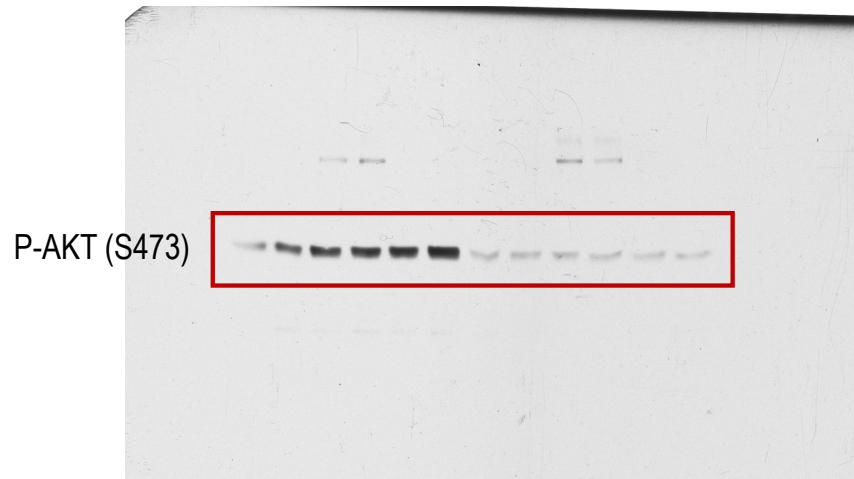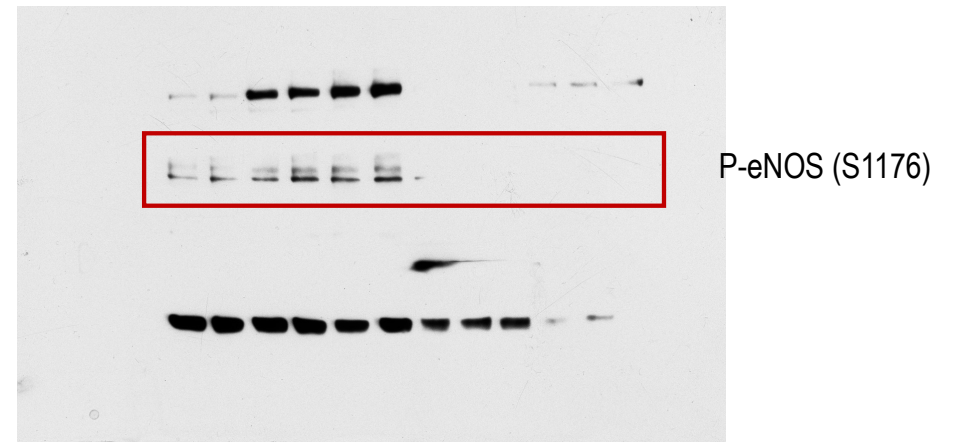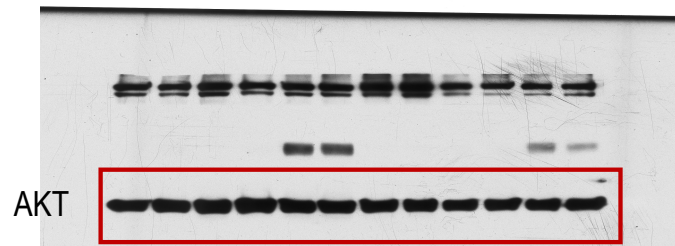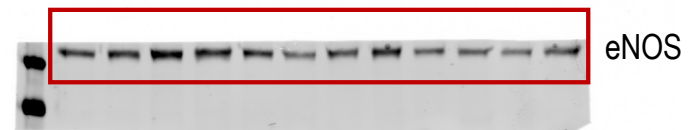

Supplement: EMBR-24-e54689-s007.pdf [file EMBR-24-e54689-s007.pdf]
